# Supplementary material for: Identification of Potential Therapeutic Gene Markers in Nasopharyngeal Carcinoma Based on Bioinformatics Analysis
Source: PubMed Central journal article supplement — Clin Transl Sci. 2019 Dec 21;13(2):265–74. doi: 10.1111/cts.12690 (PMC7070980; doi:10.1111/cts.12690), 2019-12-21
Supplement: CTS-13-265-s001.pdf [file CTS-13-265-s001.pdf]

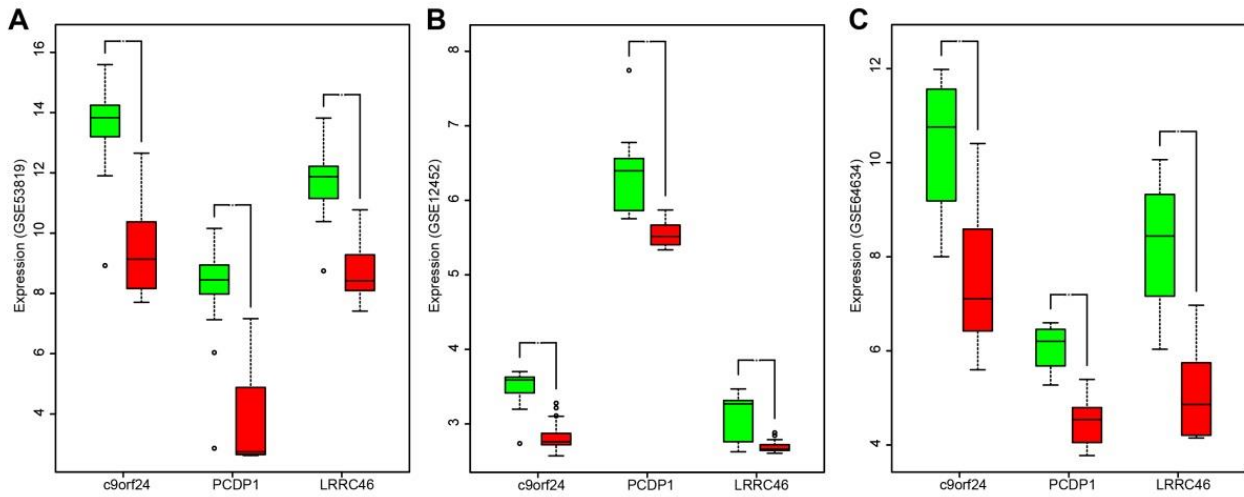

**Figure S1** c9orf24, PCDP1 and LRRC46 are poorly expressed in NPC. A-C, the expression of c9orf24, PCDP1 and LRRC46 in gene expression datasets GSE53819, GSE12452 and GSE64634. The abscissa represents gene name, and the ordinate represents gene expression. The green box plot indicates gene expression in non-cancerous tissue specimens, and the red one indicates gene expression in NPC specimens. NPC, nasopharyngeal carcinoma.
