# Supplementary material for: Identification of Potential Therapeutic Gene Markers in Nasopharyngeal Carcinoma Based on Bioinformatics Analysis
Source: PubMed Central journal article supplement — Clin Transl Sci. 2019 Dec 21;13(2):265–74. doi: 10.1111/cts.12690 (PMC7070980; doi:10.1111/cts.12690), 2019-12-21
Supplement: CTS-13-265-s002.pdf [file CTS-13-265-s002.pdf]

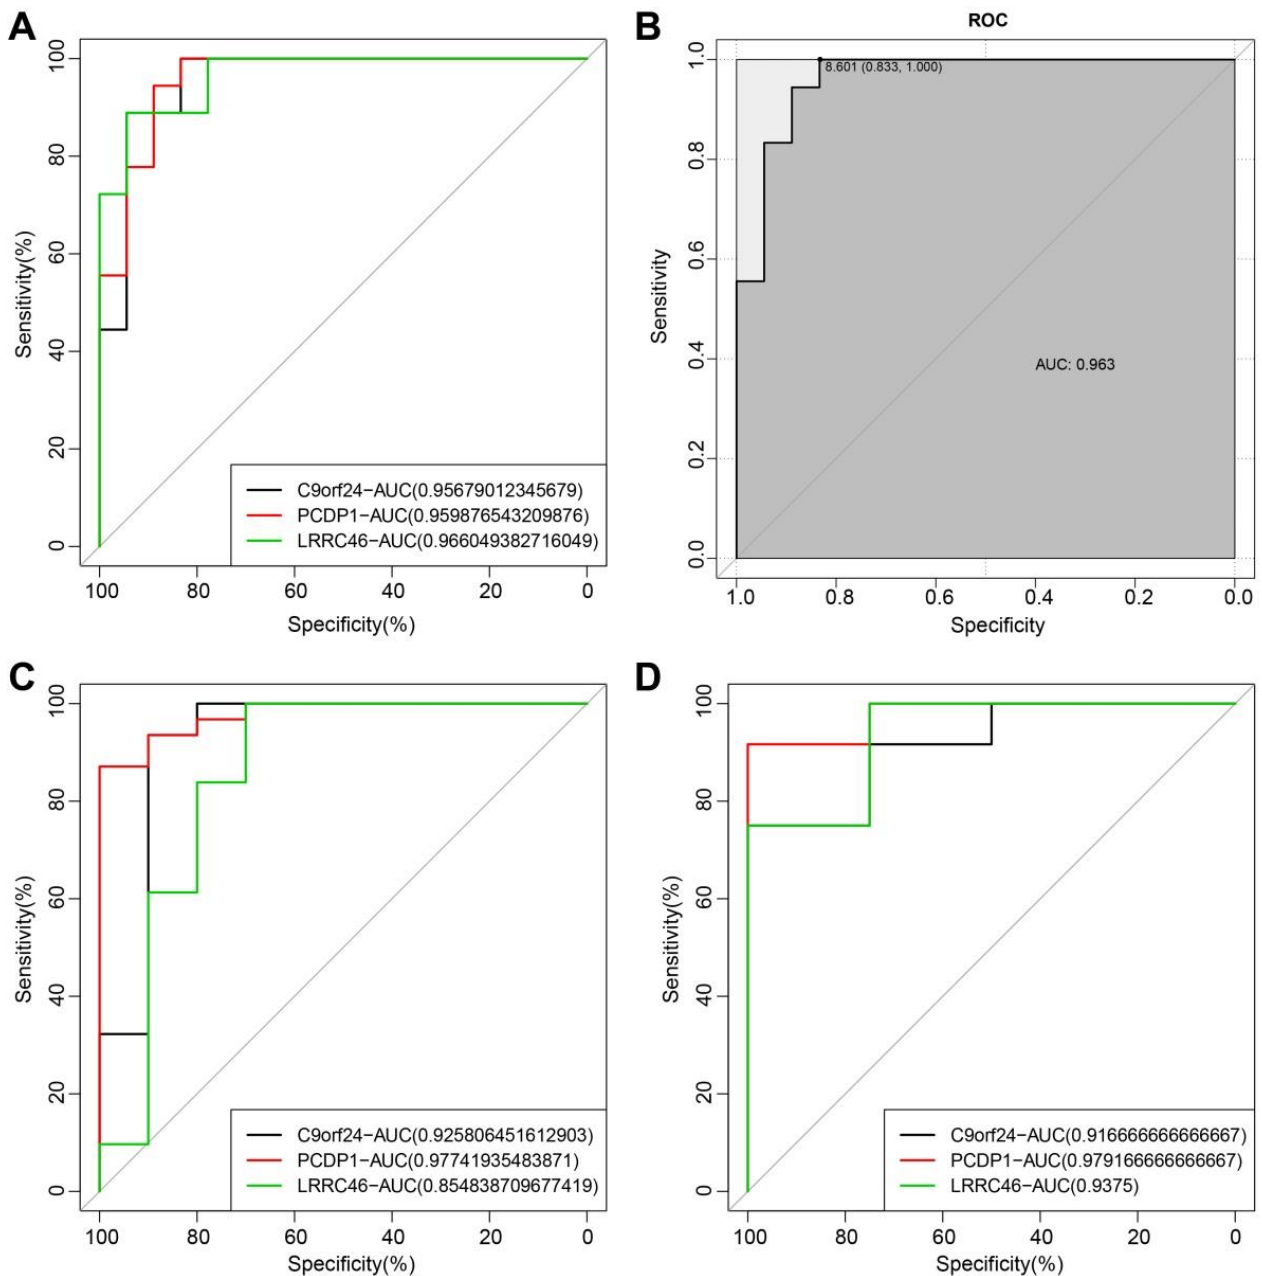

**Figure S2** c9orf24, PCDP1 and LRRC46 function as markers for NPC diagnosis. A, C, and D refer to ROC analysis results of c9orf24, PCDP1 and LRRC46 genes in the expression datasets GSE53819, GSE12452, and GSE64634, respectively. The abscissa refers to specificity (%) and the ordinate refers to sensitivity (%). The black line represents c9orf24 gene, the red line represents PCDP1 gene, and the green line represents LRRC46 gene. The values in lower right corner are the AUC values. B shows the ROC analysis results of these genes as combined diagnostic markers in the expression dataset GSE53819. NPC, nasopharyngeal carcinoma; AUC, area under curve; ROC, receiver operating characteristic.
